# Supplementary material for: Halogen-substituted triphenylamine derivatives with intense mechanoluminescence properties
Source: Royal Society of Chemistry journal article supplement (doi:10.1039/c9tc03515j), 2019-01-01
Supplement: c9tc03515j1.pdf [file c9tc03515j1.pdf]

## Electronic Supplementary Information

### Halogen-substituted triphenylamine derivatives with intense mechanoluminescence property

Jin Tu,<sup>a</sup> Yunhao Fan,<sup>a</sup> Jiaqiang Wang,<sup>a</sup> Xiaoyu Li,<sup>a</sup> Can Wang,<sup>a</sup> Yanbin Gong,<sup>a</sup> Mengmeng Han,<sup>a</sup> Qianqian Li,<sup>a</sup> and Zhen Li<sup>\*a,b</sup>

<sup>a</sup> Sauvage Center for Molecular Sciences, Department of Chemistry, Wuhan University, Wuhan 430072, China.

<sup>b</sup> Institute of Molecular Aggregation Science, Tianjin University, Tianjin 300072, China

### Table of Contents

1. **Chart S1** Some ML materials reported in previous studies.
2. Synthesis
  - 2.2 Synthetic routes
  - 2.3 NMR spectra
3. **Table S1** Optical properties of **TPA-CHO** and **TPA-CHO-2X** (X= F, Cl, Br).
4. **Table S2** Summary of crystal data and intensity collection parameters of **TPA-CHO** and **TPA-CHO-2X** (X= F, Cl, Br).
5. **Fig. S9** The images of TPA derivatives in crystal (up) and the value of torsion between the phenyl ring in crystal (bottom).
6. **Fig. S10** Emission decay of **TPA-CHO** and **TPA-CHO-2X** (X= F, Cl, Br) a) before and b) after grinding.
6. **Table S3** Single crystal information and ML activities of TPA-CHO and **TPA-CHO-2X** (X= F, Cl, Br).
7. **Fig. S11** The stacking models of those TPA derivatives in crystal in different viewing directions.
8. **Table S4** The number of C-H...O, C-H... $\pi$  and C-H...X (X= F, Cl and Br) interactions in the crystals of **TPA-CHO**, **TAP-CHO-2F**, **TAP-CHO-2Cl** and **TAP-CHO-2Br**.
9. **Table S5** Summarization of the C-H...O and C-H... $\pi$  interactions in crystal cell of **TPA-CHO<sub>a</sub>** crystal.
10. **Table S6** Summarization of the C-H...O and C-H... $\pi$  interactions in crystal cell of **TPA-CHO<sub>b</sub>** crystal.

11. **Table S7** Summarization of the C-H $\cdots$ O, C-H $\cdots$  $\pi$  and C-H $\cdots$ F interactions in crystal cell of **TPA-CHO-2F<sub>a</sub>** crystal.
12. **Table S8** Summarization of the C-H $\cdots$ O, C-H $\cdots$  $\pi$  and C-H $\cdots$ F interactions in crystal cell of **TPA-CHO-2F<sub>b</sub>** crystal.
13. **Table S9** Summarization of the C-H $\cdots$ O, C-H $\cdots$  $\pi$  and C-H $\cdots$ Cl interactions in crystal cell of **TPA-CHO-2Cl<sub>a</sub>** crystal.
14. **Table S10** Summarization of the C-H $\cdots$ O, C-H $\cdots$  $\pi$  and C-H $\cdots$ Cl interactions in crystal cell of **TPA-CHO-2Cl<sub>b</sub>** crystal.
15. **Table S11** Summarization of the C-H $\cdots$ O, C-H $\cdots$  $\pi$  and C-H $\cdots$ Br interactions in crystal cell of **TPA-CHO-2Br<sub>a</sub>** crystal.
16. **Table S12** Summarization of the C-H $\cdots$ O, C-H $\cdots$  $\pi$  and C-H $\cdots$ Br interactions in crystal cell of **TPA-CHO-2Br<sub>b</sub>** crystal.
17. **Table S13** Summarization of the C-H $\cdots$ O and C-H $\cdots$  $\pi$  and interactions between **TPA-CHO<sub>a</sub>** and **TPA-CHO<sub>b</sub>** crystal.
18. **Table S14** Summarization of the C-F $\cdots$ F-C, C-H $\cdots$ O and C-H $\cdots$ F interactions between **TPA-CHO-2F<sub>a</sub>** and **TPA-CHO-2F<sub>b</sub>** crystal.
19. **Table S15** Summarization of the C-H $\cdots$ Cl and C-H $\cdots$  $\pi$  interactions between **TPA-CHO-2Cl<sub>a</sub>** and **TPA-CHO-2Cl<sub>b</sub>** crystal.
20. **Table S16** Summarization of the C-H $\cdots$ Br and C-H $\cdots$  $\pi$  interactions between **TPA-CHO-2Br<sub>a</sub>** and **TPA-CHO-2Br<sub>b</sub>** crystal.
21. **Fig. S12** XRD patterns of **TPA-CHO** and **TPA-CHO-2X** (X= F, Cl, Br).
21. **Fig. S13** DSC curves of **TPA-CHO** and **TPA-CHO-2X** (X= F, Cl, Br).

## 1. Chart S1. Some ML materials reported in previous studies.

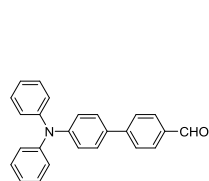

J. Mater. Chem. C., 2017, 5, 9879-9885

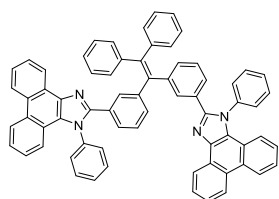

Chem. Commun., 2018, 54, 5598-5601

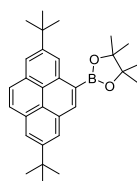

Adv. optical Mater., 2018, 6, 1800198

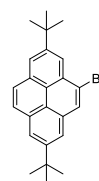

Adv. optical Mater., 2018, 6, 1800198

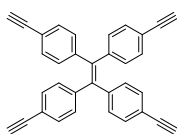

Chem. Commun., 2017, 53, 11330-11333

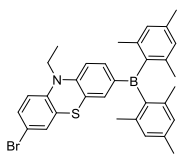

Chem. Eur. J., 2017, 23,7046-7051

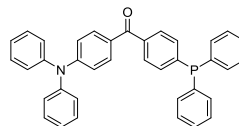

Chem. Sci. 2018, 9, 5787-5794

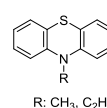

R: CH<sub>3</sub>, C<sub>2</sub>H<sub>5</sub>

Angew. Chem. Int. Ed., 2017, 56, 15299-15303

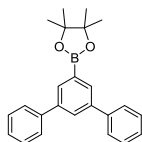

Angew. Chem. Int. Ed., 2017,55, 880-884

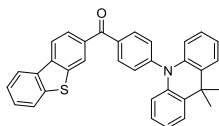

Adv. Funct. Mater., 2017, 1606458

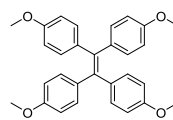

Mater. Horiz., 2016, 3, 220-225

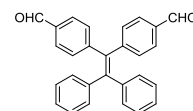

Chem. Sci., 2016, 7, 5307-5312

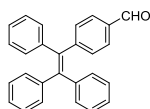

Chem. Sci., 2016, 7, 5307-5312

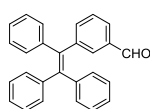

Chem. Sci., 2016, 7, 5307-5312

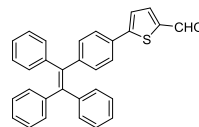

Chem. Sci., 2015, 6, 3236-3241

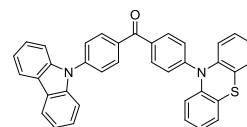

Angew. Chm. Int. Ed., 2015, 54, 874-878

## 2. Synthesis

### 2.1 Synthetic routes

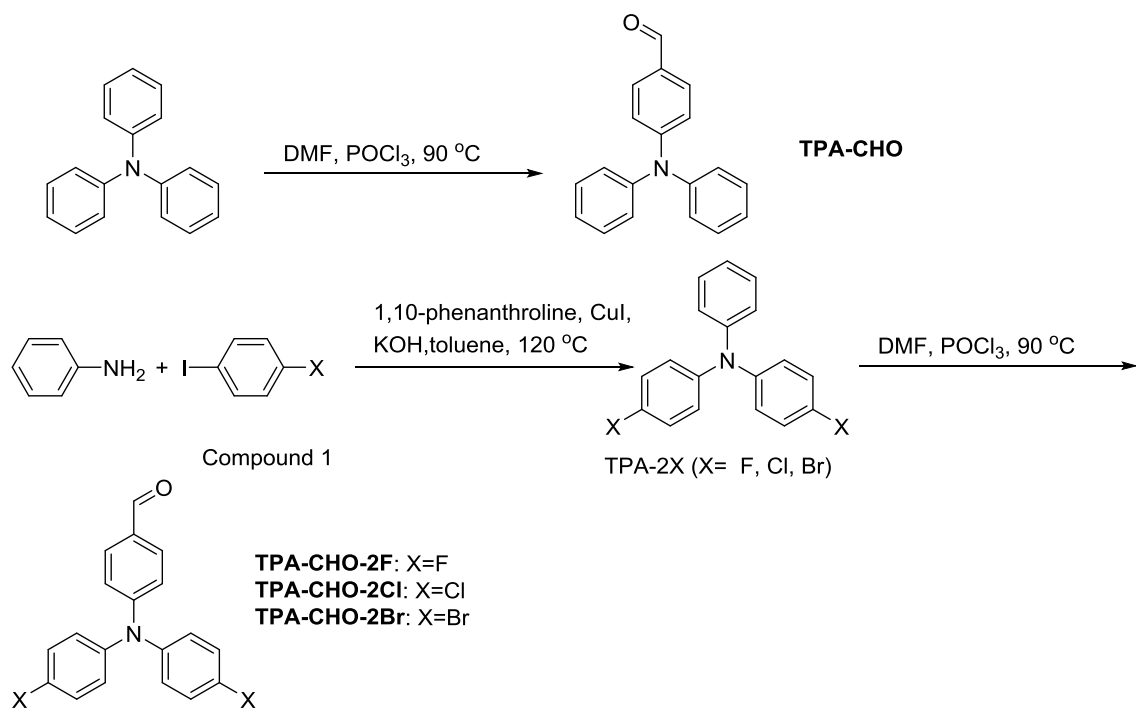

**Scheme S1.** Synthetic routes of TPA-CHO and TPA-CHO-2X ( $\text{X} = \text{F, Cl, Br}$ ).

### 3.3 NMR spectra

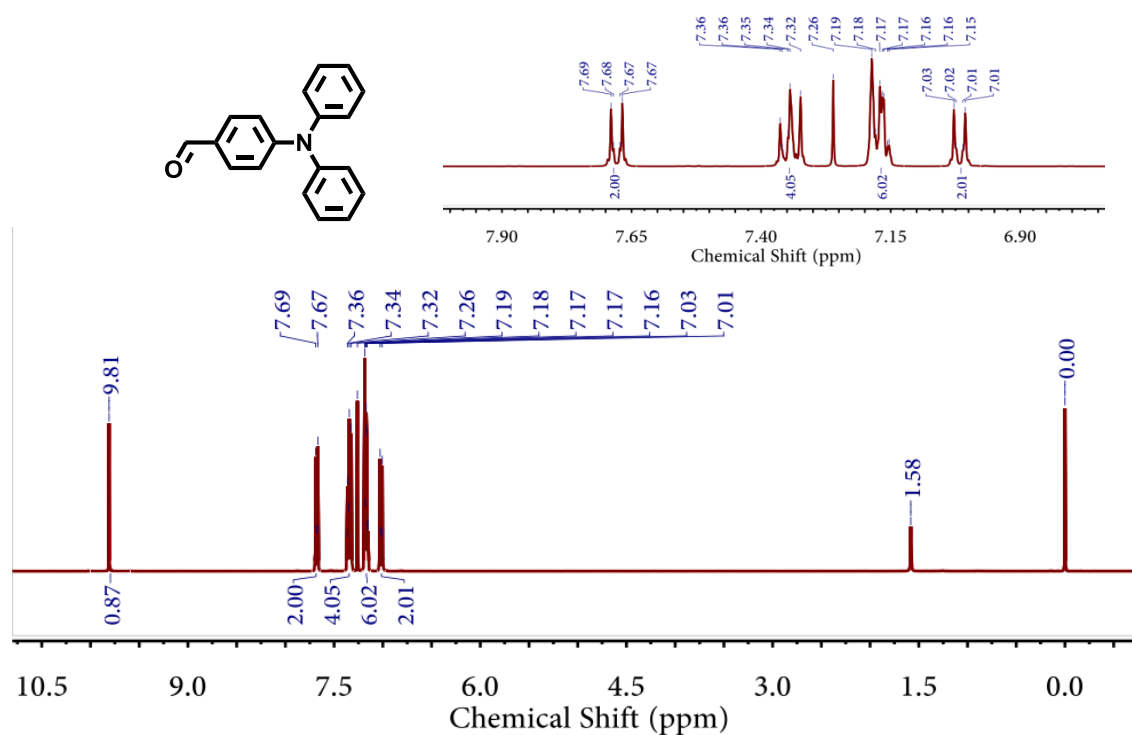

**Fig. S1**  $^1\text{H}$  NMR spectrum of TPA-CHO.

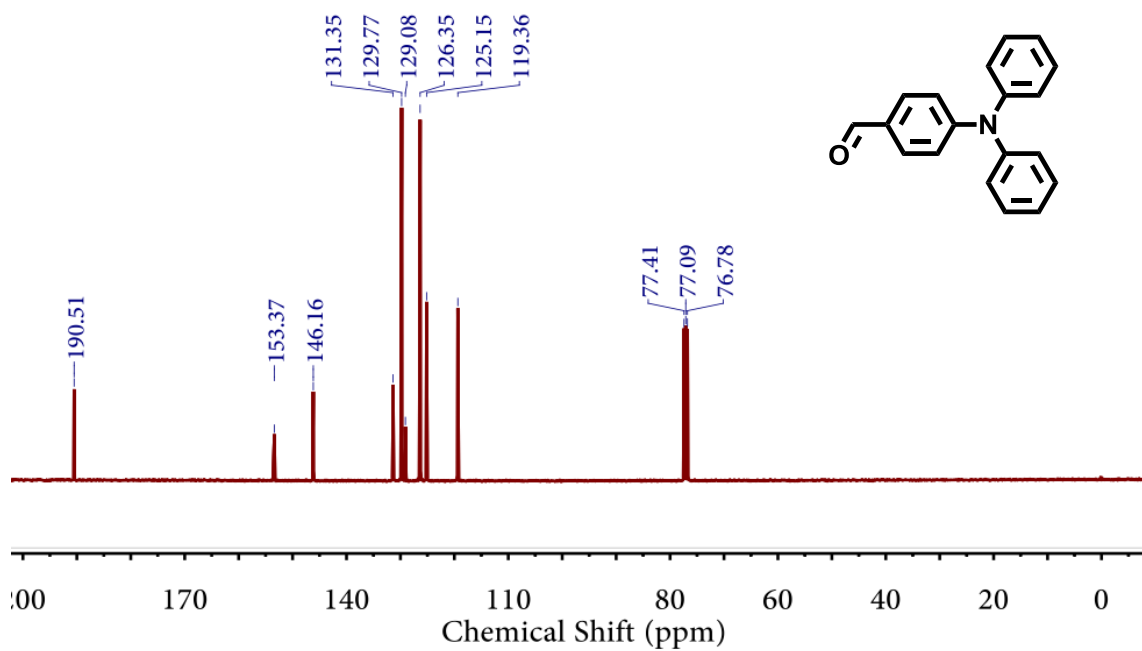

Fig. S2  $^{13}\text{C}$  NMR spectrum of TPA-CHO.

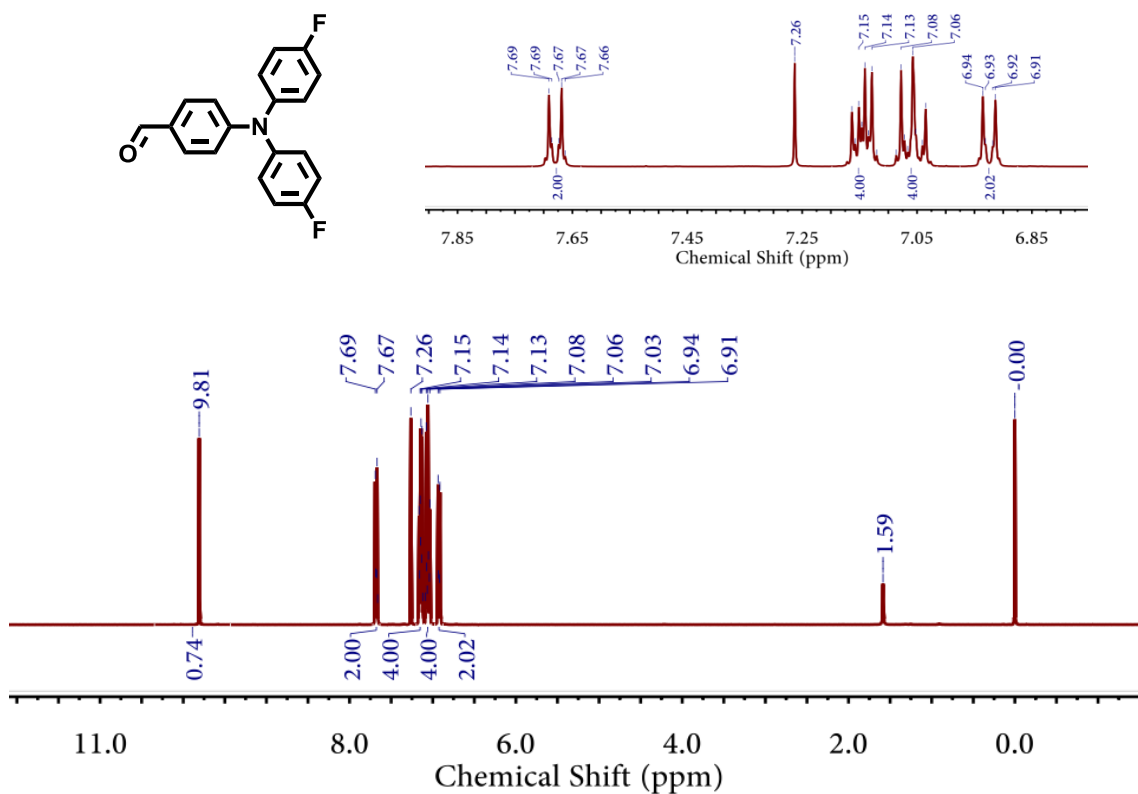

Fig. S3  $^1\text{H}$  NMR spectrum of TPA-CHO-2F.

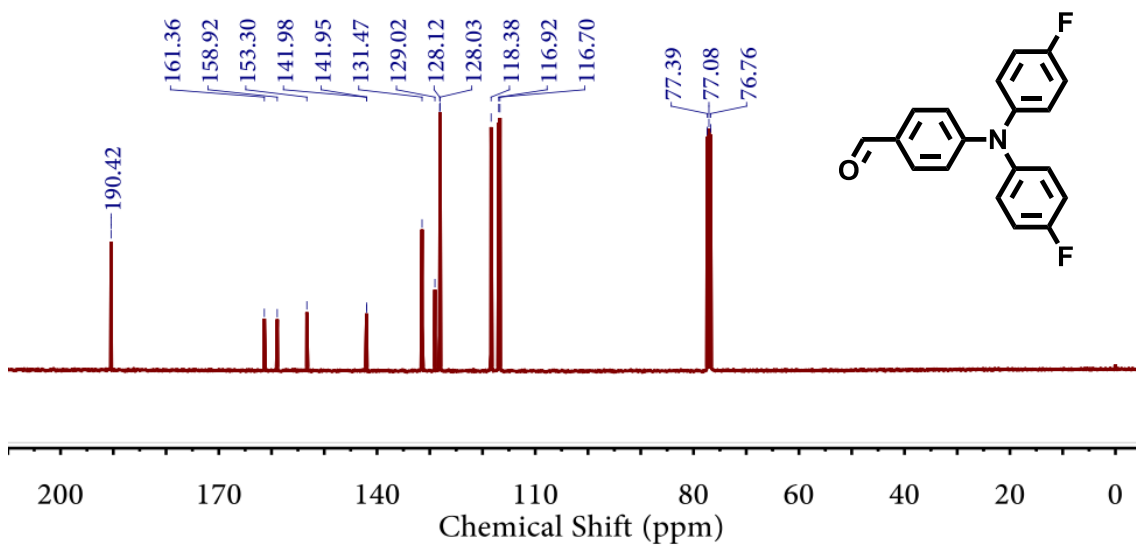

**Fig. S4**  $^{13}\text{C}$  NMR spectrum of TPA-CHO-2F.

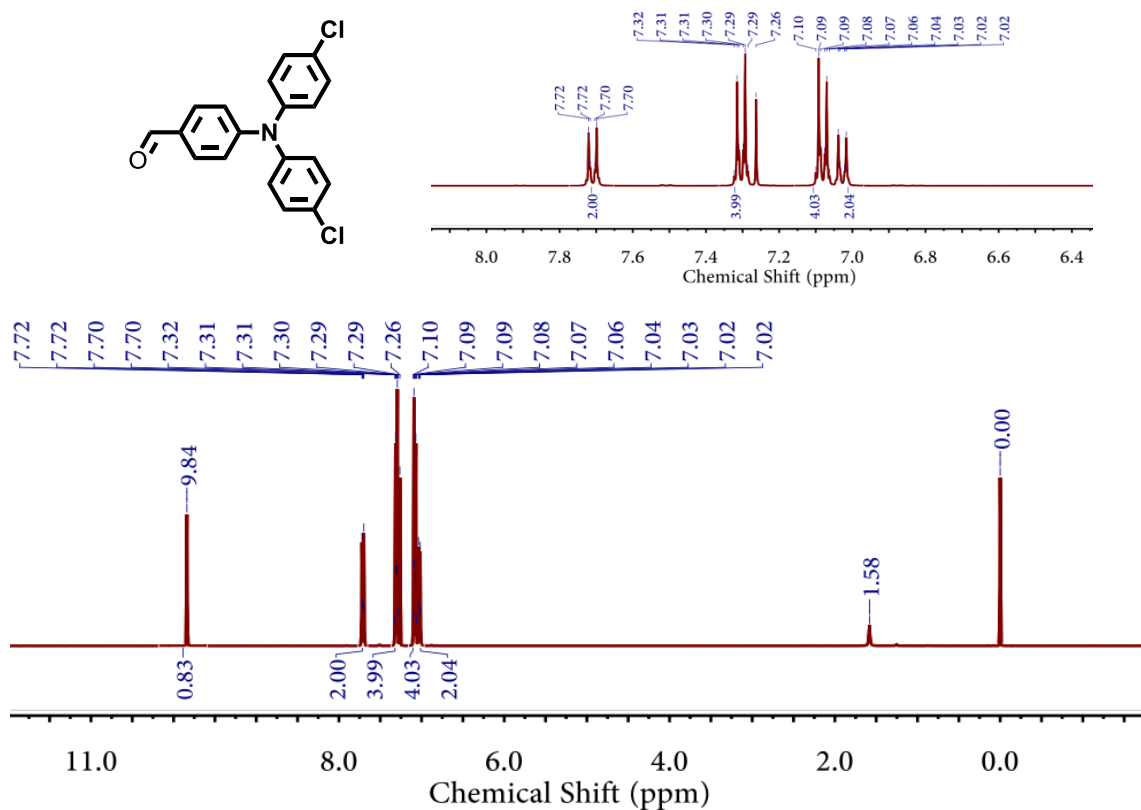

Fig. S5 <sup>1</sup>H NMR spectrum of TPA-CHO-2Cl.

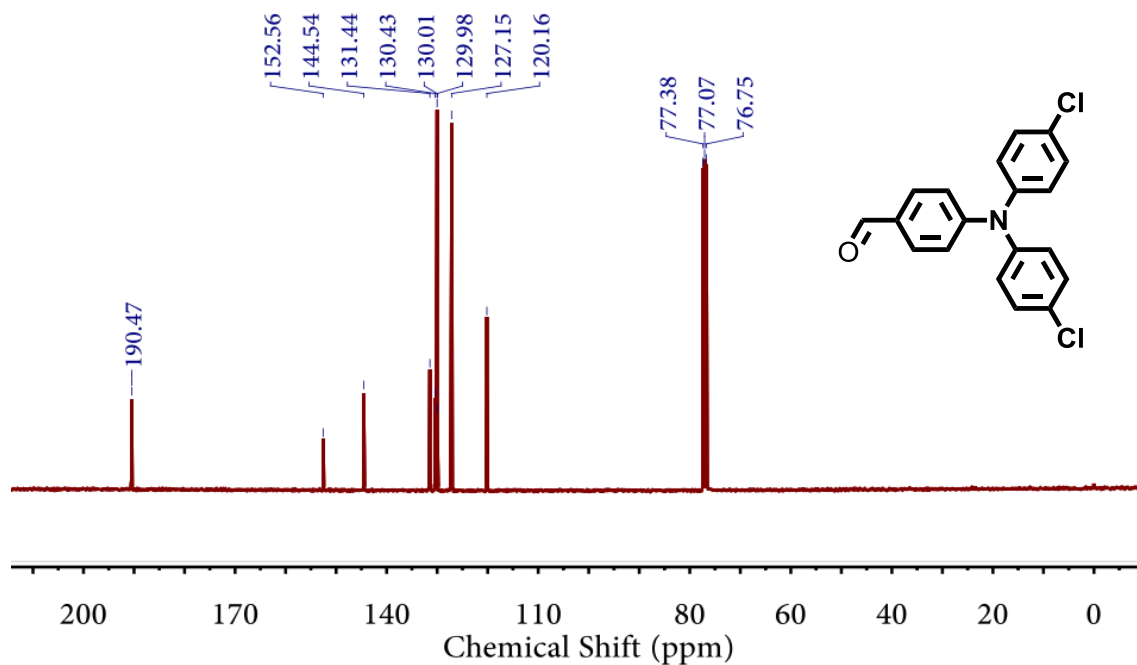

Fig. S6 <sup>13</sup>C NMR spectrum of TPA-CHO-2Cl.

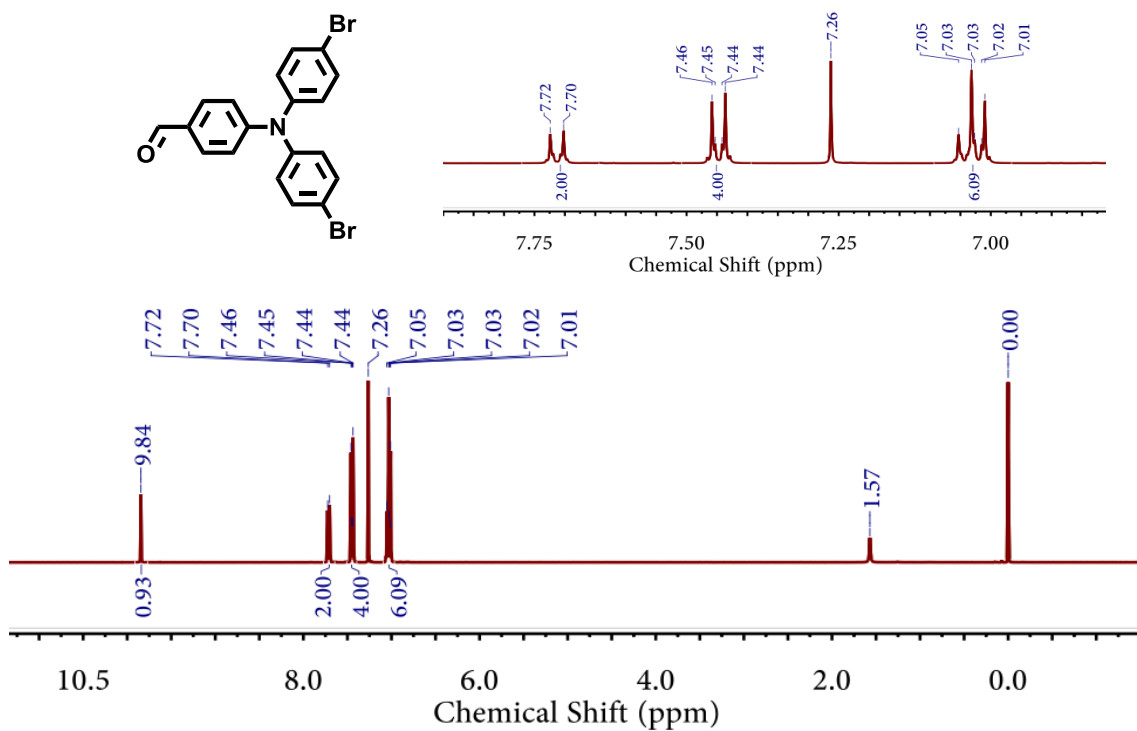

**Fig. S7**  $^1\text{H}$  NMR spectrum of TPA-CHO-2Br.

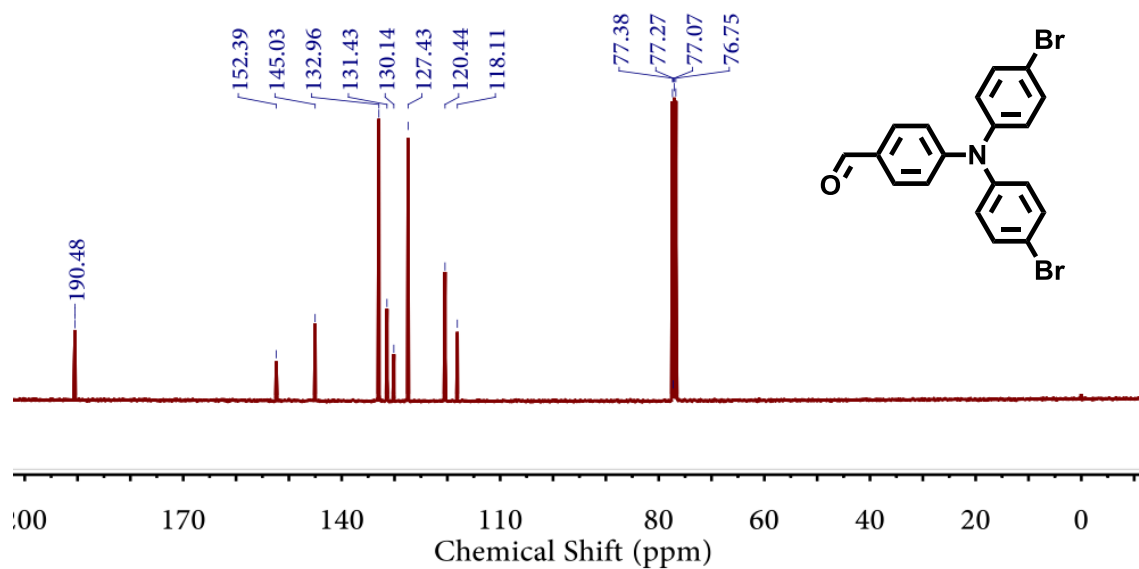

**Fig. S8**  $^{13}\text{C}$  NMR spectrum of TPA-CHO-2Br.



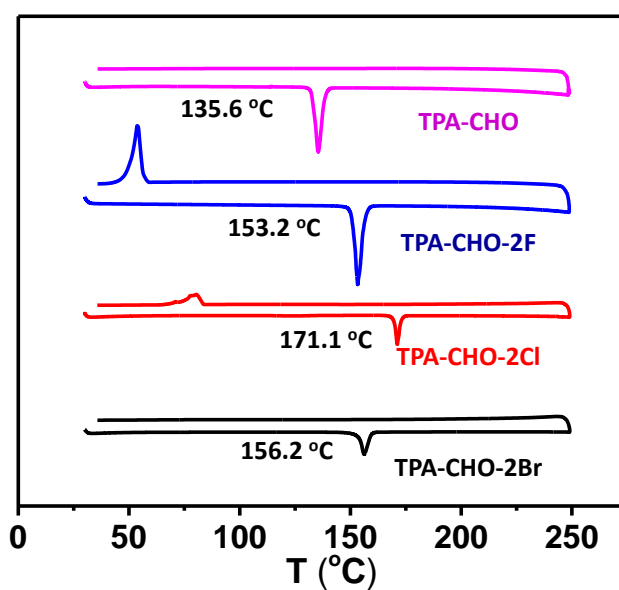

Fig. S9 DSC curves of TPA-CHO and TPA-CHO-2X (X= F, Cl, Br).

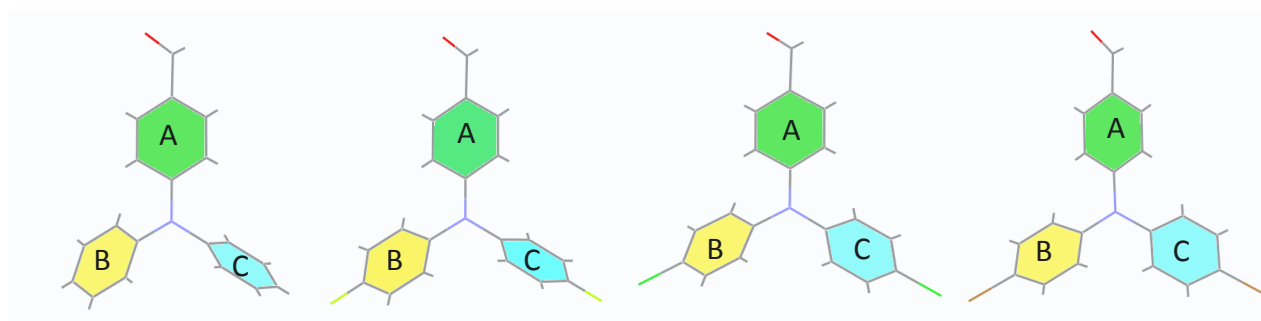

| Compound    | $\vartheta^\circ$ |       |       |                        |      |
|-------------|-------------------|-------|-------|------------------------|------|
|             | A-B               | B-C   | A-C   | Average <sup>[a]</sup> | A1   |
| TPA-CHO     | 66.67             | 80.69 | 71.29 | 72.9                   | 3.10 |
| TPA-CHO-2F  | 67.79             | 87.84 | 67.96 | 74.53                  | 5.60 |
| TPA-CHO-2Cl | 68.81             | 68.80 | 53.57 | 63.7                   | 3.05 |
| TPA-CHO-2Br | 67.99             | 66.79 | 53.26 | 62.68                  | 3.70 |

Fig. S10 The images of TPA derivatives in crystal (up) and the value of torsion of phenyl ring in crystal (bottom). [a]. Average means the average value of A-B, B-C and A-C.

**Table S1** Summary of crystal data and intensity collection parameters of **TPA-CHO** and **TPA-CHO-2X** (X= F, Cl, Br).

| Compound                                       | TPA-CHO                                     | TPA-CHO-2F                                        | TPA-CHO-2Cl                                        | TPA-CHO-2Br                                        |
|------------------------------------------------|---------------------------------------------|---------------------------------------------------|----------------------------------------------------|----------------------------------------------------|
| Empirical formula                              | C <sub>19</sub> H <sub>15</sub> NO          | C <sub>19</sub> H <sub>13</sub> F <sub>2</sub> NO | C <sub>19</sub> H <sub>13</sub> Cl <sub>2</sub> NO | C <sub>19</sub> H <sub>13</sub> Br <sub>2</sub> NO |
| Formula weight                                 | 273.32                                      | 309.30                                            | 342.20                                             | 431.12                                             |
| Crystal system                                 | Monoclinic                                  | Orthorhombic                                      | Monoclinic                                         | Monoclinic                                         |
| Temp. / K                                      | 296(2) K                                    | 297(2) K                                          | 296(2) K                                           | 296(2) K                                           |
| Space group                                    | P2(1)/c                                     | Pbca                                              | Pc                                                 | Pc                                                 |
| a/Å                                            | 12.0916(17)                                 | 13.173(4)                                         | 9.117(4)                                           | 9.244(4)                                           |
| b/Å                                            | 11.4255(16)                                 | 13.212(4)                                         | 8.400(3)                                           | 8.389(4)                                           |
| c/Å                                            | 10.9413(16)                                 | 17.216(5)                                         | 11.068(4)                                          | 11.306(5)                                          |
| α/°                                            | 90                                          | 90                                                | 90                                                 | 90                                                 |
| β/°                                            | 101.999(3)                                  | 90                                                | 107.736(7)                                         | 107.570(8)                                         |
| γ/°                                            | 90                                          | 90                                                | 90                                                 | 90                                                 |
| volume/Å <sup>3</sup>                          | 1478.5(4)                                   | 2996.2(16)                                        | 807.2(6)                                           | 835.9(6)                                           |
| Z                                              | 4                                           | 8                                                 | 2                                                  | 2                                                  |
| Dcalcd./ gcm <sup>-3</sup>                     | 1.228                                       | 1.371                                             | 1.408                                              | 1.713                                              |
| F(000)                                         | 576                                         | 1280                                              | 352                                                | 424                                                |
| Index ranges                                   | -15<=h<=11,<br>-14<=k<=14,<br>-13<=l<=13    | -15<=h<=15,<br>-15<=k<=12,<br>-20<=l<=20          | -11<=h<=11,<br>-9<=k<=10,<br>-12<=l<=13            | -10<=h<=10,<br>-9<=k<=9,<br>-13<=l<=10             |
| Reflections collected                          | 9559                                        | 19399                                             | 5621                                               | 5366                                               |
| Independent reflections                        | 3056 [R(int) = 0.0288]                      | 2564 [R(int) = 0.0930]                            | 2737 [R(int) = 0.0345]                             | 2547 [R(int) = 0.0795]                             |
| Completeness to theta = 24.776°                | 99.8%                                       | 99.7%                                             | 99.8%                                              | 99.8%                                              |
| Refinement method                              | Full-matrix least-squares on F <sup>2</sup> | Full-matrix least-squares on F <sup>2</sup>       | Full-matrix least-squares on F <sup>2</sup>        | Full-matrix least-squares on F <sup>2</sup>        |
| Data / restraints / parameters                 | 3056/0/191                                  | 2564/0/219                                        | 2737/2/208                                         | 2547/12/182                                        |
| Goodness-of-fit on F <sup>2</sup>              | 1.188                                       | 1.014                                             | 1.188                                              | 0.959                                              |
| Final R indices [I>2sigma(I)]                  | R1 = 0.0407, wR2 = 0.0928                   | R1=0.0453, wR2=0.0993                             | R1 = 0.0429, wR2 = 0.1121                          | R1 = 0.0582, wR2 = 0.1391                          |
| R indices (all data)                           | R1 = 0.0594, wR2 = 0.1052                   | R1 = 0.0948, wR2 = 0.1206                         | R1 = 0.0544, wR2 = 0.1219                          | R1 = 0.1002, wR2 = 0.1605                          |
| Largest diff. peak and hole/ e.Å <sup>-3</sup> | 0.148 and -0.158                            | 0.151 and -0.137                                  | 0.176 and -0.182                                   | 0.488 and -0.477                                   |

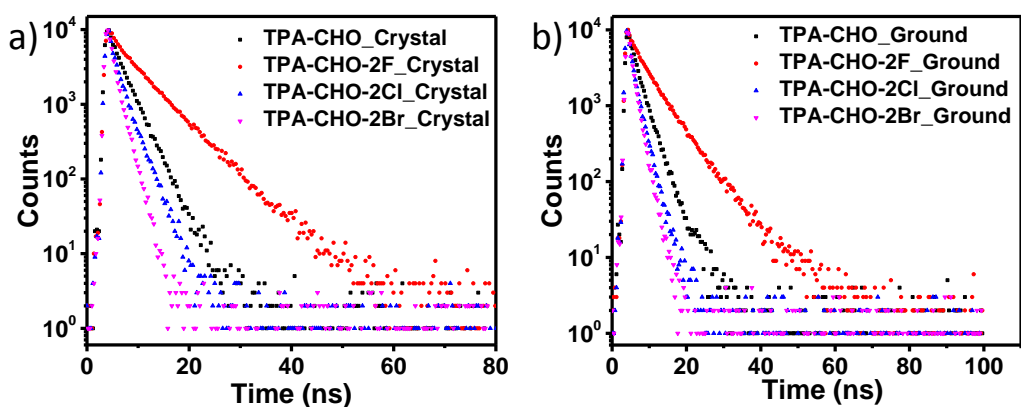

**Fig. S11** Emission decay of TPA-CHO and TPA-CHO-2X (X= F, Cl, Br) a) before and b) after grinding.

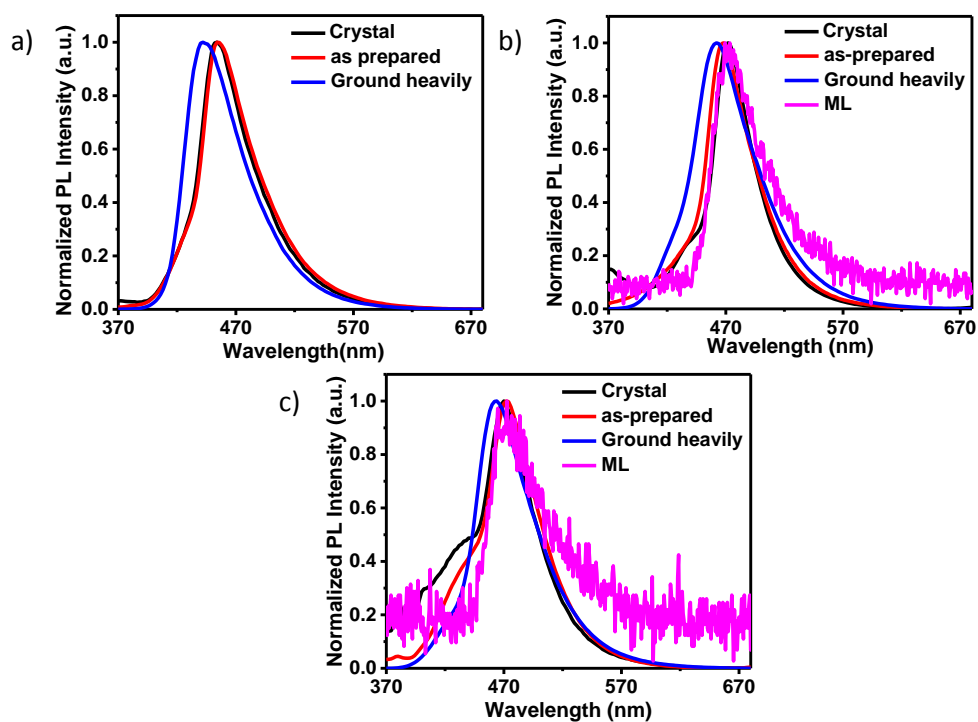

**Fig. S12** PL spectra of TPA-CHO a), TPA-CHO-2Cl b) and TPA-CHO-2Br c) in crystal, after grinding, as-prepared state and ML spectra of TPA-CHO-2Cl and TPA-CHO-2Br.

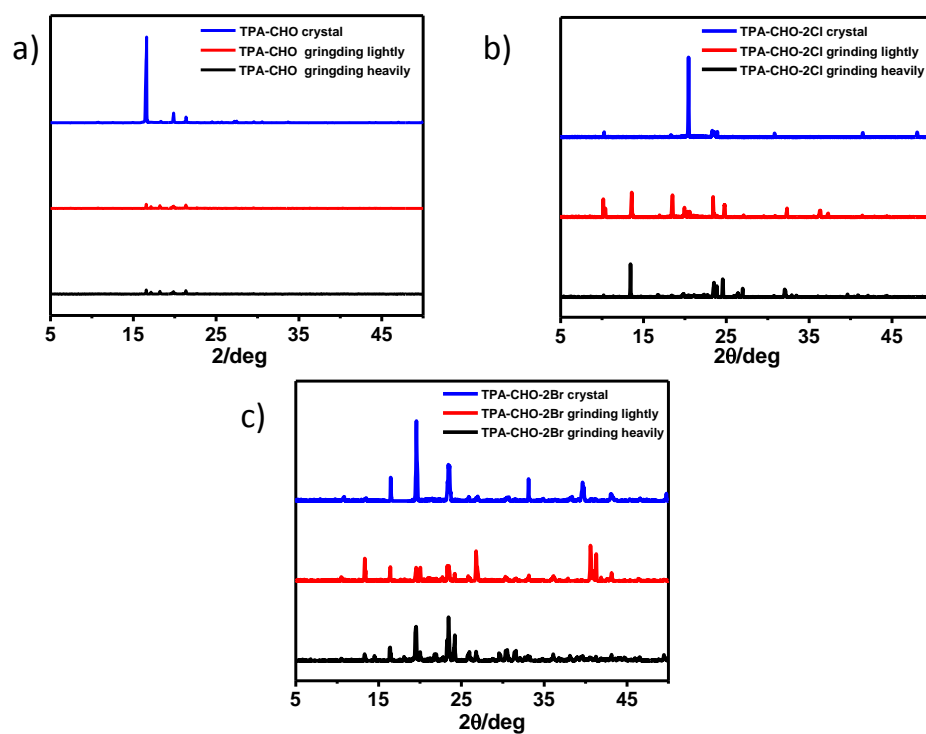

**Fig. S13** XRD patterns of TPA-CHO and TPA-CHO-2X (X= Cl, Br).

**Table S2** Single crystal information and ML activities of TPA-CHO and TPA-CHO-2X (X= F, Cl, Br).

| Compound           | Crystal system | Space group | Symmetry           | ML Active |
|--------------------|----------------|-------------|--------------------|-----------|
| <b>TPA-CHO</b>     | Monoclinic     | P2(1)/c     | Centrosymmetric    | Inactive  |
| <b>TPA-CHO-2F</b>  | Orthorhombic   | Pbca        | Centrosymmetric    | Active    |
| <b>TPA-CHO-2Cl</b> | Monoclinic     | Pc          | Noncentrosymmetric | Active    |
| <b>TPA-CHO-2Br</b> | Monoclinic     | Pc          | Noncentrosymmetric | Active    |

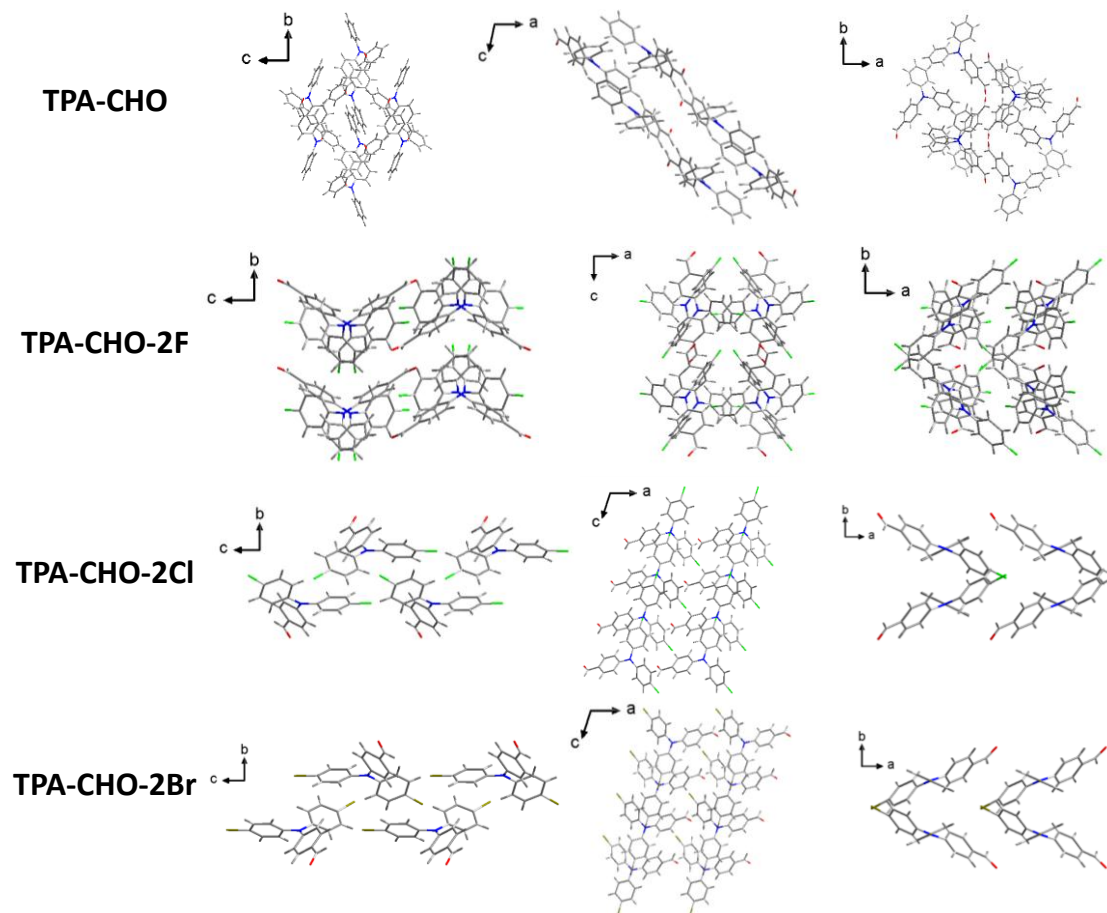

**Fig. S14** The stacking models of those TPA derivatives in crystal in different viewing directions.

**Table S3** The number of C-H $\cdots$  $\pi$ , C-H $\cdots$ O and C-H $\cdots$ X (X= F, Cl and Br) interactions in the crystals of TPA-CHO, TAP-CHO-2F, TAP-CHO-2Cl and TAP-CHO-2Br.

| Crystal                  | Intramolecular<br>C-H $\cdots$ O | No. | Intramolecular<br>C-H $\cdots$ $\pi$ | No. | Intramolecular<br>C-H $\cdots$ X | No. |
|--------------------------|----------------------------------|-----|--------------------------------------|-----|----------------------------------|-----|
| TPA-CHO <sub>a</sub>     | 2.753-3.075                      | 6   | 3.247-3.553                          | 4   | -                                | -   |
| TPA-CHO <sub>b</sub>     | 2.753-3.075                      | 6   | 3.247-3.553                          | 4   | -                                | -   |
| TPA-CHO-2F <sub>a</sub>  | 2.462-3.886                      | 5   | 3.466-3.978                          | 11  | 2.479-3.804                      | 16  |
| TPA-CHO-2F <sub>b</sub>  | 2.462-3.886                      | 5   | 3.466-3.978                          | 11  | 2.479-3.804                      | 16  |
| TPA-CHO-2Cl <sub>a</sub> | 2.895-2.895                      | 2   | 3.049-3.8012                         | 4   | 2.998-3.357                      | 11  |
| TPA-CHO-2Cl <sub>b</sub> | 2.895-2.895                      | 2   | 3.049-3.8012                         | 4   | 2.998-3.357                      | 11  |
| TPA-CHO-2Br <sub>a</sub> | 2.846-2.846                      | 2   | 3.176-3.916                          | 4   | 3.093-3.427                      | 11  |
| TPA-CHO-2Br <sub>b</sub> | 2.846-2.846                      | 2   | 3.176-3.916                          | 4   | 3.093-3.427                      | 11  |

**Table S4** Summarization of the C-H...O and C-H... $\pi$  interactions in crystal cell of **TPA-CHO<sub>a</sub>** crystal.

| Type of Interaction | No. | d/Å   |
|---------------------|-----|-------|
| C-H...O             | 1   | 2.753 |
|                     | 2   | 2.732 |
|                     | 3   | 2.894 |
|                     | 4   | 2.894 |
|                     | 5   | 3.075 |
|                     | 6   | 3.075 |
| C-H... $\pi$        | 1   | 3.247 |
|                     | 2   | 3.247 |
|                     | 3   | 3.553 |
|                     | 4   | 3.553 |

**Table S5** Summarization of the C-H...O and C-H... $\pi$  interactions in crystal cell of **TPA-CHO<sub>b</sub>** crystal.

| Type of Interaction | No. | d/Å   |
|---------------------|-----|-------|
| C-H...O             | 1   | 2.753 |
|                     | 2   | 2.732 |
|                     | 3   | 3.075 |
|                     | 4   | 3.075 |
|                     | 5   | 2.894 |
|                     | 6   | 2.894 |
| C-H... $\pi$        | 1   | 3.553 |
|                     | 2   | 3.553 |
|                     | 3   | 3.247 |
|                     | 4   | 3.247 |

**Table S6** Summarization of the C-H...O, C-H... $\pi$  and C-H...F interactions in crystal cell of TPA-CHO-2F<sub>a</sub> crystal.

| Type of Interaction | No. | d/Å   |
|---------------------|-----|-------|
| C-H...O             | 1   | 2.462 |
|                     | 2   | 2.602 |
|                     | 3   | 2.602 |
|                     | 4   | 3.886 |
|                     | 5   | 3.886 |
| C-H... $\pi$        | 1   | 3.466 |
|                     | 2   | 3.466 |
|                     | 3   | 3.698 |
|                     | 4   | 3.702 |
|                     | 5   | 3.702 |
|                     | 6   | 3.704 |
|                     | 7   | 3.704 |
|                     | 8   | 3.938 |
|                     | 9   | 3.943 |
|                     | 10  | 3.976 |
|                     | 11  | 3.978 |
| C-H...F             | 1   | 2.479 |
|                     | 2   | 2.479 |
|                     | 3   | 2.663 |
|                     | 4   | 2.902 |
|                     | 5   | 2.902 |
|                     | 6   | 2.903 |
|                     | 7   | 2.903 |
|                     | 8   | 3.270 |
|                     | 9   | 3.434 |
|                     | 10  | 3.434 |
|                     | 11  | 3.500 |
|                     | 12  | 3.500 |
|                     | 13  | 3.670 |
|                     | 14  | 3.670 |
|                     | 15  | 3.804 |
|                     | 16  | 3.804 |

**Table S7** Summarization of the C-H...O, C-H... $\pi$  and C-H...F interactions in crystal cell of TPA-CHO-2F<sub>b</sub> crystal.

| Type of Interaction | No. | d/Å   |
|---------------------|-----|-------|
| C-H...O             | 1   | 2.462 |
|                     | 2   | 2.602 |
|                     | 3   | 2.602 |
|                     | 4   | 3.886 |
|                     | 5   | 3.886 |
| C-H... $\pi$        | 1   | 3.466 |
|                     | 2   | 3.466 |
|                     | 3   | 3.698 |
|                     | 4   | 3.702 |
|                     | 5   | 3.702 |
|                     | 6   | 3.704 |
|                     | 7   | 3.704 |
|                     | 8   | 3.938 |
|                     | 9   | 3.943 |
|                     | 10  | 3.976 |
|                     | 11  | 3.978 |
| C-H...F             | 1   | 2.479 |
|                     | 2   | 2.479 |
|                     | 3   | 2.663 |
|                     | 4   | 2.902 |
|                     | 5   | 2.902 |
|                     | 6   | 2.903 |
|                     | 7   | 2.903 |
|                     | 8   | 3.270 |
|                     | 9   | 3.434 |
|                     | 10  | 3.434 |
|                     | 11  | 3.500 |
|                     | 12  | 3.500 |
|                     | 13  | 3.670 |
|                     | 14  | 3.670 |
|                     | 15  | 3.804 |
|                     | 16  | 3.804 |



**Table S8** Summarization of the C-H...O, C-H... $\pi$  and C-H...Cl interactions in crystal cell of TPA-CHO-2Cl<sub>a</sub> crystal.

| Type of Interaction | No. | d/Å   |
|---------------------|-----|-------|
| C-H...O             | 1   | 2.895 |
|                     | 2   | 2.895 |
| C-H... $\pi$        | 1   | 3.812 |
|                     | 2   | 3.812 |
|                     | 3   | 3.049 |
|                     | 4   | 3.049 |
| C-H...Cl            | 1   | 3.168 |
|                     | 2   | 3.168 |
|                     | 3   | 3.357 |
|                     | 4   | 2.998 |
|                     | 5   | 3.186 |
|                     | 6   | 3.186 |
|                     | 7   | 3.313 |
|                     | 8   | 3.343 |
|                     | 9   | 3.313 |
|                     | 10  | 3.343 |
|                     | 11  | 3.357 |

**Table S9** Summarization of the C-H...O, C-H... $\pi$  and C-H...Cl interactions in crystal cell of TPA-CHO-2Cl<sub>b</sub> crystal.

| Type of Interaction | No. | d/Å   |
|---------------------|-----|-------|
| C-H...O             | 1   | 2.895 |
|                     | 2   | 2.895 |
| C-H... $\pi$        | 1   | 3.812 |
|                     | 2   | 3.812 |
|                     | 3   | 3.049 |
|                     | 4   | 3.049 |
| C-H...Cl            | 1   | 3.168 |
|                     | 2   | 3.168 |
|                     | 3   | 3.357 |
|                     | 4   | 2.998 |
|                     | 5   | 3.186 |
|                     | 6   | 3.186 |
|                     | 7   | 3.313 |
|                     | 8   | 3.343 |
|                     | 9   | 3.313 |
|                     | 10  | 3.343 |
|                     | 11  | 3.357 |

**Table S10** Summarization of the C-H...O, C-H... $\pi$  and C-H...Br interactions in crystal cell of TPA-CHO-2Br<sub>a</sub> crystal.

| Type of Interaction | No. | d/Å   |
|---------------------|-----|-------|
| C-H...O             | 1   | 2.846 |
|                     | 2   | 2.846 |
| C-H... $\pi$        | 1   | 3.176 |
|                     | 2   | 3.176 |
|                     | 3   | 3.916 |
|                     | 4   | 3.916 |
| C-H...Br            | 1   | 3.395 |
|                     | 2   | 3.270 |
|                     | 3   | 3.292 |
|                     | 4   | 3.145 |
|                     | 5   | 3.395 |
|                     | 6   | 3.270 |
|                     | 7   | 3.292 |
|                     | 8   | 3.145 |
|                     | 9   | 3.427 |
|                     | 10  | 3.093 |
|                     | 11  | 3.427 |

**Table S11** Summarization of the C-H...O, C-H... $\pi$  and C-H...Br interactions in crystal cell of TPA-CHO-2Br<sub>b</sub> crystal.

| Type of Interaction | No. | d/Å   |
|---------------------|-----|-------|
| C-H...O             | 1   | 2.846 |
|                     | 2   | 2.846 |
| C-H... $\pi$        | 1   | 3.176 |
|                     | 2   | 3.176 |
|                     | 3   | 3.916 |
|                     | 4   | 3.916 |
| C-H...Br            | 1   | 3.395 |
|                     | 2   | 3.270 |
|                     | 3   | 3.292 |
|                     | 4   | 3.145 |
|                     | 5   | 3.395 |
|                     | 6   | 3.270 |
|                     | 7   | 3.292 |
|                     | 8   | 3.145 |
|                     | 9   | 3.427 |
|                     | 10  | 3.093 |
|                     | 11  | 3.427 |

**Table S12** Summarization of the C-H...O and C-H... $\pi$  interactions between **TPA-CHO<sub>a</sub>** and **TPA-CHO<sub>b</sub>** crystal.

| Type of Interaction | No. | d/Å   |
|---------------------|-----|-------|
| C-H...O             | 1   | 2.515 |
|                     | 2   | 2.515 |
|                     | 3   | 2.515 |
|                     | 4   | 2.515 |
| C-H... $\pi$        | 1   | 3.288 |
|                     | 2   | 3.288 |
|                     | 3   | 3.505 |
|                     | 4   | 3.505 |
|                     | 5   | 3.877 |
|                     | 6   | 3.877 |
|                     | 7   | 3.877 |
|                     | 8   | 3.877 |
|                     | 9   | 3.071 |
|                     | 10  | 3.071 |
|                     | 11  | 3.071 |
|                     | 12  | 3.808 |
|                     | 13  | 3.071 |
|                     | 14  | 3.808 |

**Table S13** Summarization of the C-F...F-C, C-H...O and C-H...F interactions between **TPA-CHO-2F<sub>a</sub>** and **TPA-CHO-2F<sub>b</sub>** crystal.

| Type of Interaction | No. | d/Å   |
|---------------------|-----|-------|
| C-F...F-C           | 1   | 3.863 |
| C-H...O             | 1   | 3.263 |
|                     | 2   | 3.263 |
|                     | 3   | 3.173 |
|                     | 4   | 3.173 |
|                     | 5   | 2.915 |
|                     | 6   | 2.915 |
|                     | 7   | 2.915 |
|                     | 8   | 2.915 |
|                     | 9   | 3.966 |
|                     | 10  | 3.966 |
|                     | 11  | 3.966 |
|                     | 12  | 3.966 |
|                     | 1   | 2.447 |

|         |    |       |
|---------|----|-------|
| C-H...F | 2  | 2.447 |
|         | 3  | 3.528 |
|         | 4  | 3.528 |
|         | 5  | 3.675 |
|         | 6  | 3.675 |
|         | 7  | 3.675 |
|         | 8  | 3.675 |
|         | 9  | 3.320 |
|         | 10 | 3.320 |
|         | 11 | 3.320 |
|         | 12 | 3.320 |
|         | 13 | 3.398 |
|         | 14 | 3.398 |

**Table S14** Summarization of the C-H...Cl and C-H... $\pi$  interactions between **TPA-CHO-2Cl<sub>a</sub>** and **TPA-CHO-2Cl<sub>b</sub>** crystal.

| Type of Interaction | No. | d/Å   |
|---------------------|-----|-------|
| C-H...Cl            | 1   | 3.335 |
|                     | 2   | 3.951 |
|                     | 3   | 3.335 |
|                     | 4   | 3.951 |
|                     | 5   | 3.335 |
|                     | 6   | 3.951 |
|                     | 7   | 3.546 |
|                     | 8   | 2.984 |
|                     | 9   | 2.984 |
|                     | 10  | 3.546 |
|                     | 11  | 3.546 |
|                     | 12  | 3.546 |
|                     | 13  | 2.984 |
|                     | 14  | 2.984 |
|                     | 15  | 3.546 |
|                     | 16  | 2.984 |
|                     | 17  | 2.984 |
|                     | 18  | 3.975 |
|                     | 19  | 3.060 |
|                     | 20  | 3.975 |
|                     | 21  | 3.060 |
|                     | 22  | 3.975 |
|                     | 23  | 3.975 |
|                     | 24  | 3.975 |
|                     | 25  | 3.060 |

|              |    |       |
|--------------|----|-------|
|              | 26 | 3.975 |
|              | 27 | 3.886 |
|              | 28 | 3.886 |
|              | 29 | 3.886 |
|              | 30 | 3.951 |
|              | 31 | 3.951 |
|              | 32 | 3.335 |
|              | 33 | 3.335 |
|              | 34 | 3.335 |
| C-H... $\pi$ | 1  | 3.779 |
|              | 2  | 3.779 |
|              | 3  | 3.781 |
|              | 4  | 3.779 |
|              | 5  | 3.779 |
|              | 6  | 3.779 |
|              | 7  | 3.583 |
|              | 8  | 3.597 |
|              | 9  | 3.583 |
|              | 10 | 3.597 |
|              | 11 | 3.597 |
|              | 12 | 3.597 |

**Table S15** Summarization of the C-H...Br and C-H... $\pi$  interactions between **TPA-CHO-2Br<sub>a</sub>** and **TPA-CHO-2Br<sub>b</sub>** crystal.

| Type of Interaction | No. | d/Å   |
|---------------------|-----|-------|
| C-H...Cl            | 1   | 2.979 |
|                     | 2   | 3.954 |
|                     | 3   | 2.979 |
|                     | 4   | 3.954 |
|                     | 5   | 2.979 |
|                     | 6   | 3.954 |
|                     | 7   | 2.979 |
|                     | 8   | 3.954 |
|                     | 9   | 2.979 |
|                     | 10  | 3.954 |
|                     | 11  | 2.979 |
|                     | 12  | 3.954 |
|                     | 13  | 3.642 |
|                     | 14  | 3.372 |
|                     | 15  | 3.131 |
|                     | 16  | 3.904 |
|                     | 17  | 3.642 |
|                     | 18  | 3.372 |

|              |    |       |
|--------------|----|-------|
|              | 19 | 3.642 |
|              | 20 | 3.372 |
|              | 21 | 3.131 |
|              | 22 | 3.904 |
|              | 23 | 3.642 |
|              | 24 | 3.372 |
|              | 25 | 3.642 |
|              | 26 | 3.372 |
|              | 27 | 3.131 |
|              | 28 | 3.904 |
|              | 29 | 3.642 |
|              | 30 | 3.372 |
| C-H... $\pi$ | 1  | 3.637 |
|              | 2  | 3.637 |
|              | 3  | 3.637 |
|              | 4  | 3.637 |
|              | 5  | 3.637 |
|              | 6  | 3.637 |
|              | 7  | 3.897 |
|              | 8  | 3.897 |
|              | 9  | 3.897 |
|              | 10 | 3.897 |
|              | 11 | 3.897 |
|              | 12 | 3.897 |

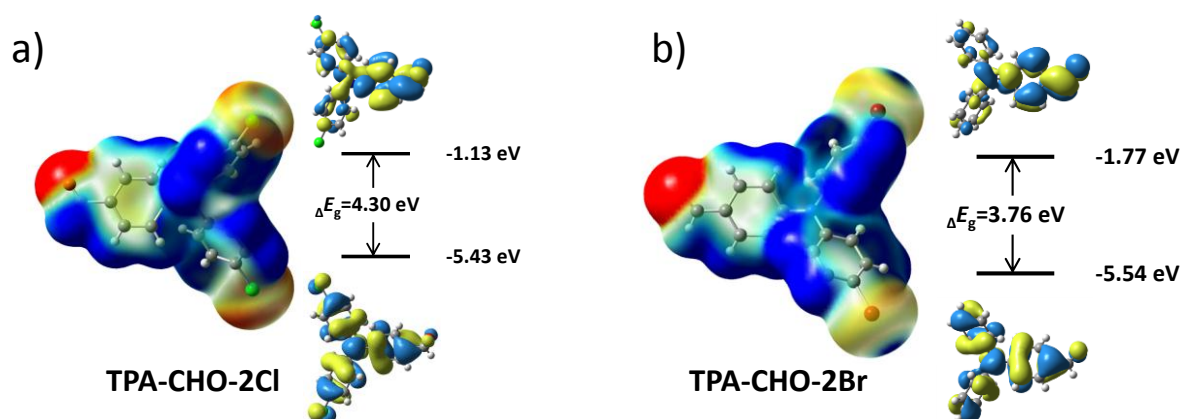

Fig. S15 a) Electrostatic potential diagram and HOMO and LUMO of **TPA-CHO-2Cl** a) and **TPA-CHO-2Br** b).
